# Supplementary material for: Synthesis of degradable poly(ε-caprolactone)-based graft copolymers via a “grafting-from” approach
Source: Royal Society of Chemistry journal article supplement (doi:10.1039/c6py01674j), 2016-01-01
Supplement: c6py01674j1.pdf [file c6py01674j1.pdf]

Supporting Information to:

“Synthesis of degradable poly( $\epsilon$ -caprolactone)-based graft copolymers via a  
“grafting-from” approach”

Panagiotis Bexis<sup>a</sup>, Anthony W. Thomas<sup>a</sup>, Craig A. Bell<sup>a,b,c</sup>, and Andrew P. Dove<sup>a\*</sup>

<sup>a</sup> *Department of Chemistry, University of Warwick, Gibbet Hill Road, Coventry, CV4 7AL, UK.*

<sup>b</sup> *Australian Institute for Bioengineering and Nanotechnology, The University of Queensland, St Lucia, Queensland, 4072, Australia.*

<sup>c</sup> *Centre for Advanced Imaging, The University of Queensland, St Lucia, Queensland, 4072, Australia.*

Corresponding Authors

\* a.p.dove@warwick.ac.uk

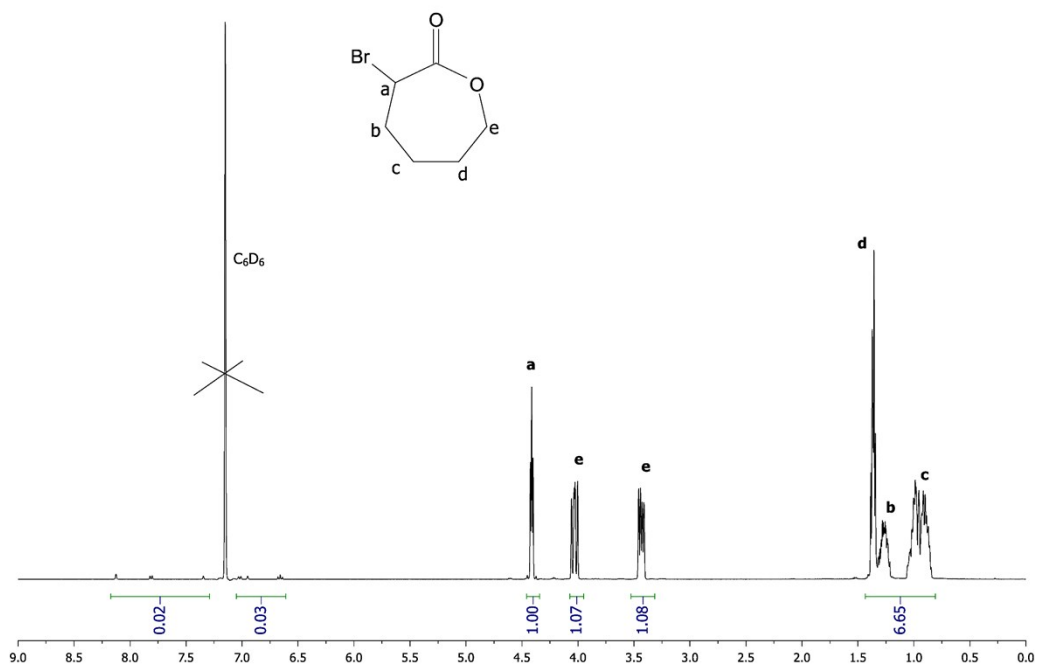

**Figure S1.**  $^1\text{H}$  NMR (400 MHz, 298K,  $\text{CDCl}_3$ ) spectrum of  $\alpha$ -bromo- $\epsilon$ -caprolactone ( $\alpha$ BrCL).

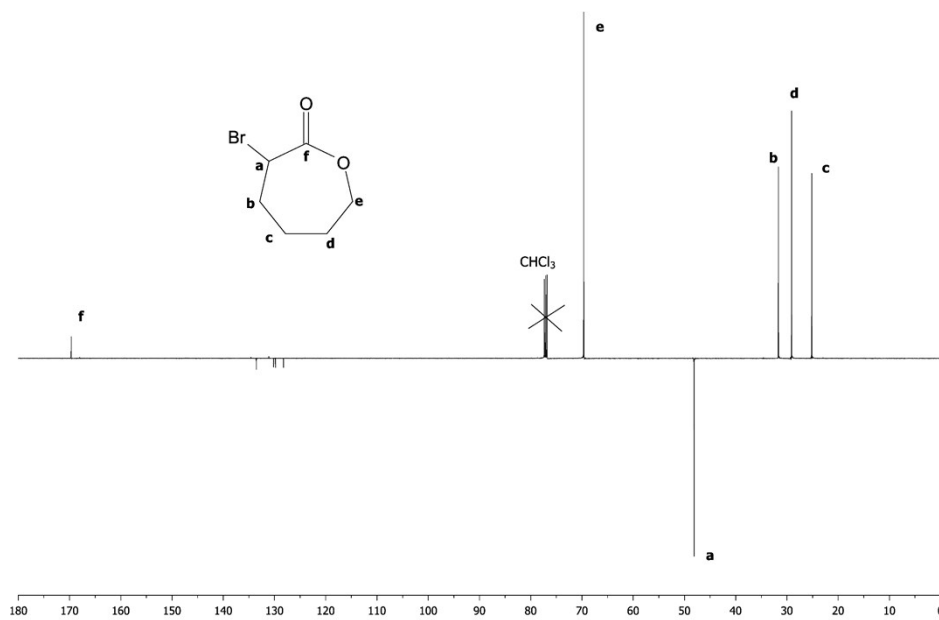

**Figure S2.**  $^{13}\text{C}$  NMR (125 MHz, 298K,  $\text{CDCl}_3$ ) spectrum of  $\alpha$ -bromo- $\epsilon$ -caprolactone ( $\alpha$ BrCL).

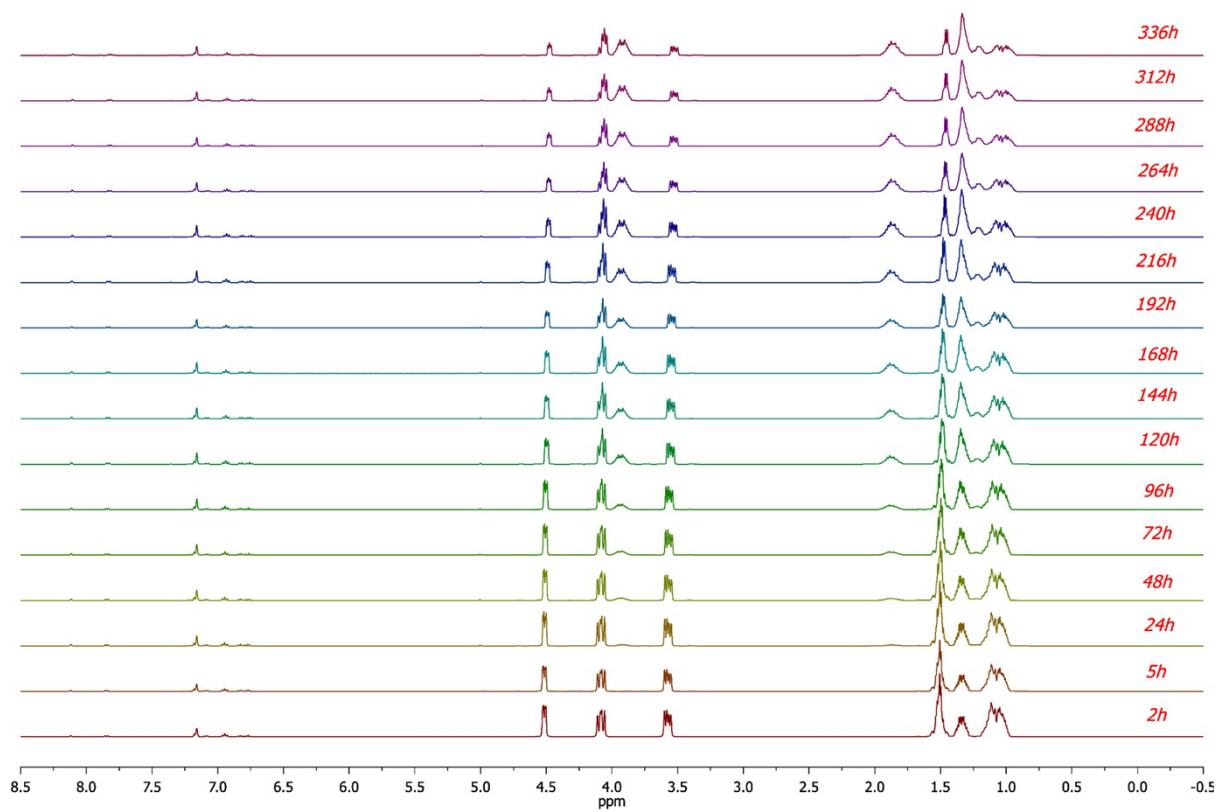

**Figure S3.** Stacked <sup>1</sup>H NMR spectra for the ROP of  $\alpha$ BrCL against time (400 MHz, 298K, C<sub>6</sub>D<sub>6</sub>).

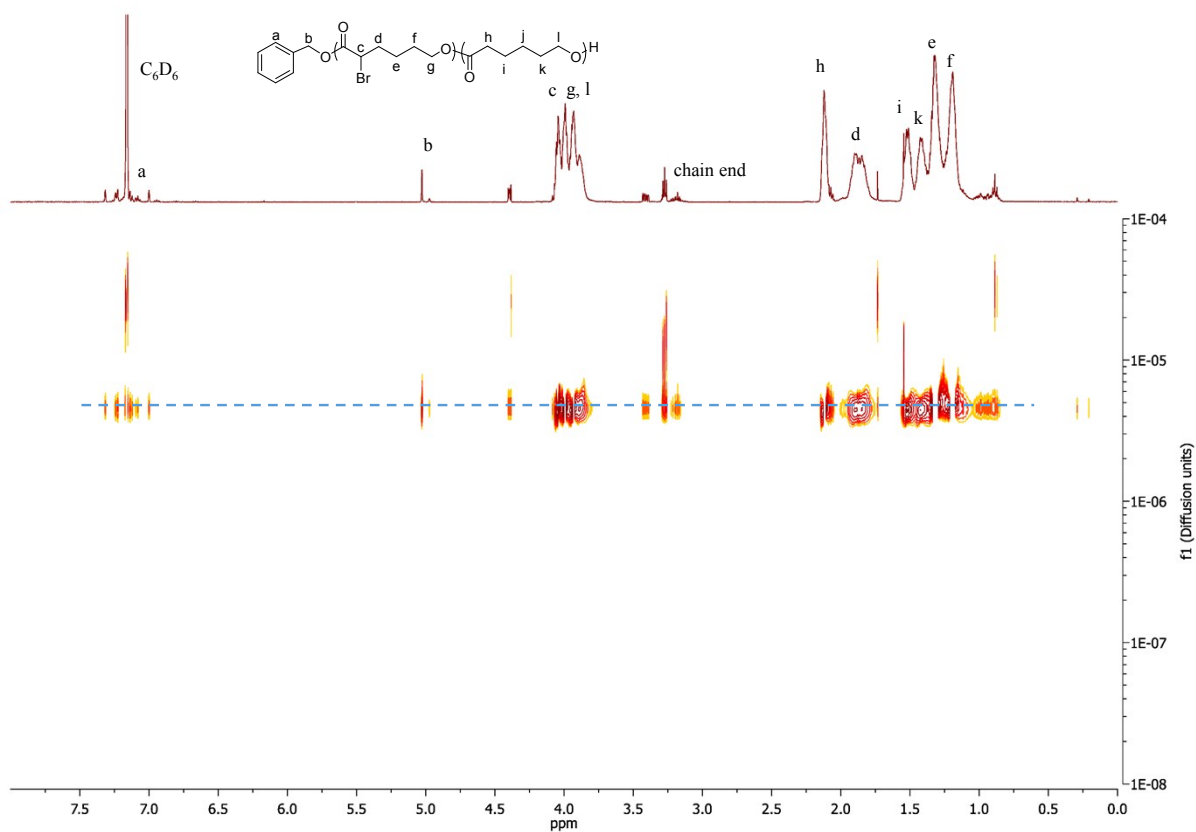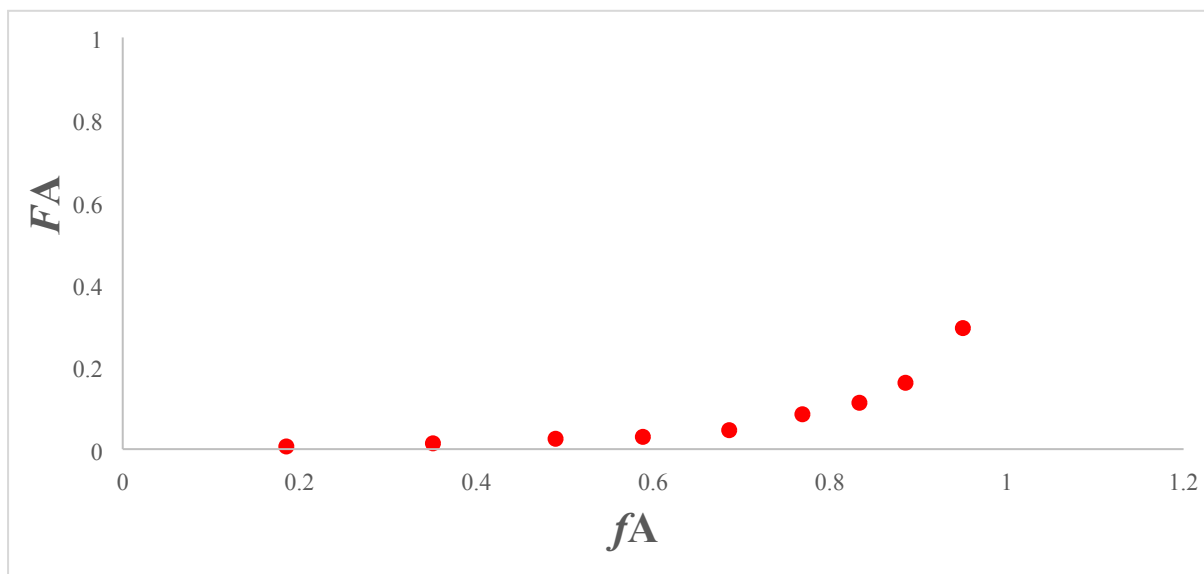

**Table S1.** Mole fraction of monomers in the initial feed and copolymers.

| Target<br>( $\alpha$ BrCL/CL) | CL feed <sup>a</sup> | BrCL feed <sup>a</sup> | CL conv. (%) <sup>a</sup> | $\alpha$ BrCL conv.<br>(%) <sup>a</sup> | PCL<br>ratio <sup>a</sup> | PBrCL<br>ratio <sup>a</sup> |
|-------------------------------|----------------------|------------------------|---------------------------|-----------------------------------------|---------------------------|-----------------------------|
| 0/100                         | 1                    | 0                      | 4                         |                                         | 1                         |                             |
| 10/90                         | 0.9                  | 0.1                    | 4.74                      | 4.6                                     | 0.51                      | 0.49                        |
| 20/80                         | 0.8                  | 0.2                    | 5.3                       | 0.85                                    | 0.86                      | 0.14                        |
| 30/70                         | 0.72                 | 0.28                   | 5.4                       | 1.3                                     | 0.8                       | 0.2                         |
| 40/60                         | 0.62                 | 0.38                   | 5.9                       | 0.7                                     | 0.89                      | 0.11                        |
| 50/50                         | 0.52                 | 0.48                   | 4.9                       | 3.6                                     | 0.57                      | 0.43                        |
| 60/40                         | 0.42                 | 0.58                   | 4.7                       | 0.2                                     | 0.96                      | 0.04                        |
| 70/30                         | 0.33                 | 0.67                   | 5.6                       | 0.15                                    | 0.97                      | 0.03                        |
| 80/20                         | 0.21                 | 0.79                   | 5.3                       | 0.16                                    | 0.97                      | 0.03                        |
| 90/10                         | 0.1                  | 0.9                    | 5.6                       | 1.23                                    | 0.82                      | 0.18                        |
| 100/0                         | 0                    | 1                      |                           | 6.4                                     |                           | 1                           |

<sup>a</sup>Determined by <sup>1</sup>H NMR spectroscopy.

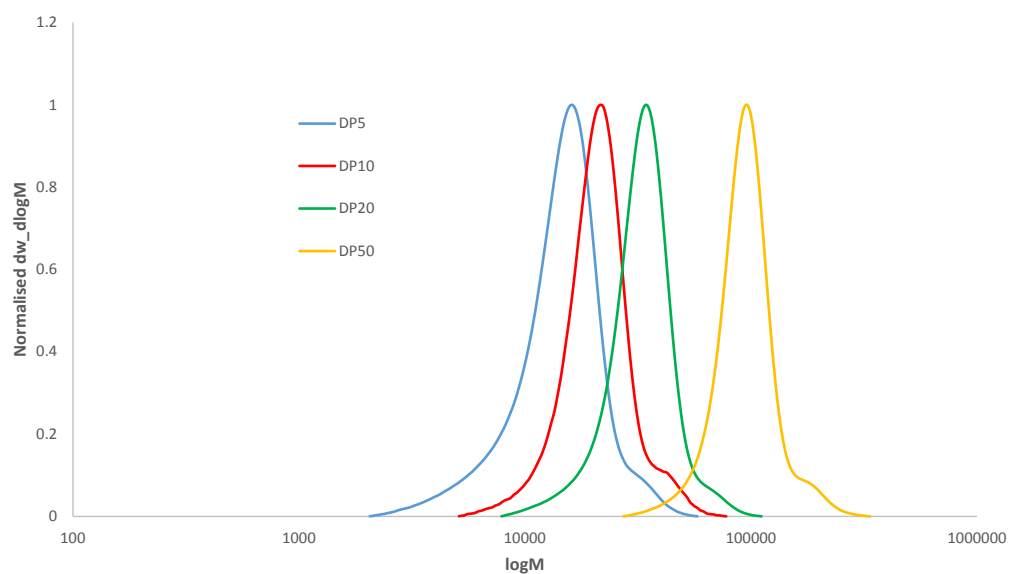

**Figure S6.** Size exclusion chromatograms of PMA polymers grafted from the PBrCL<sub>80</sub> macroinitiator, in DMSO (SEC CHCl<sub>3</sub>, Polystyrene used as standard).

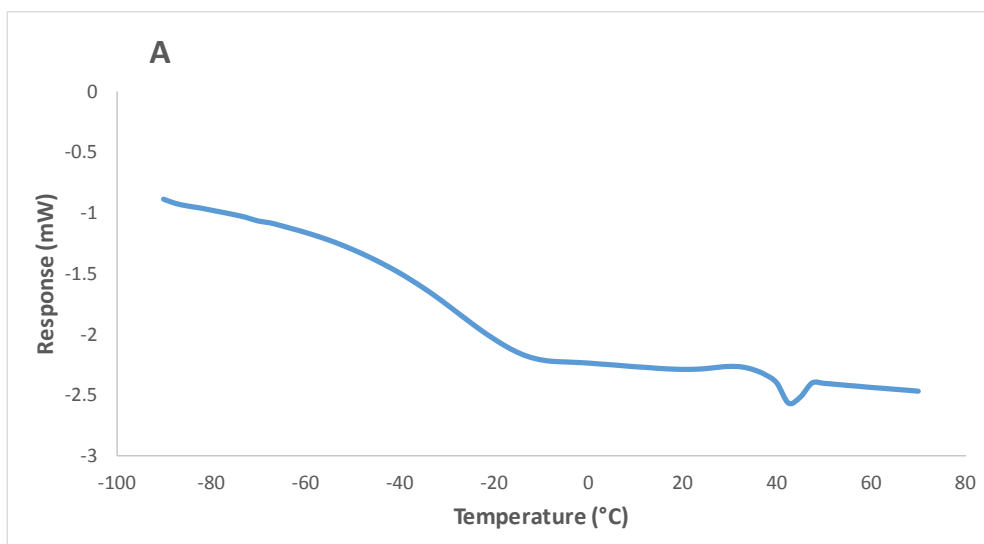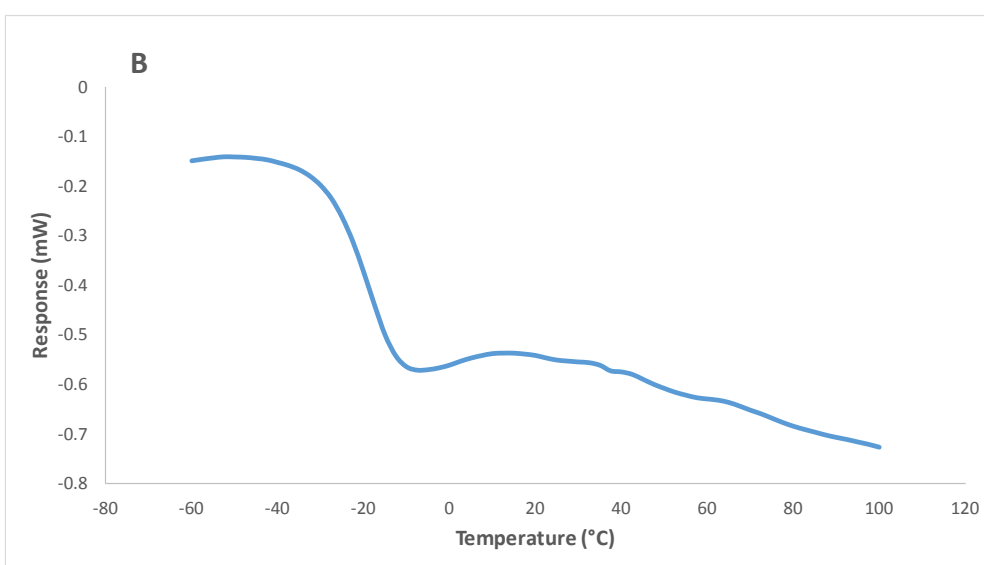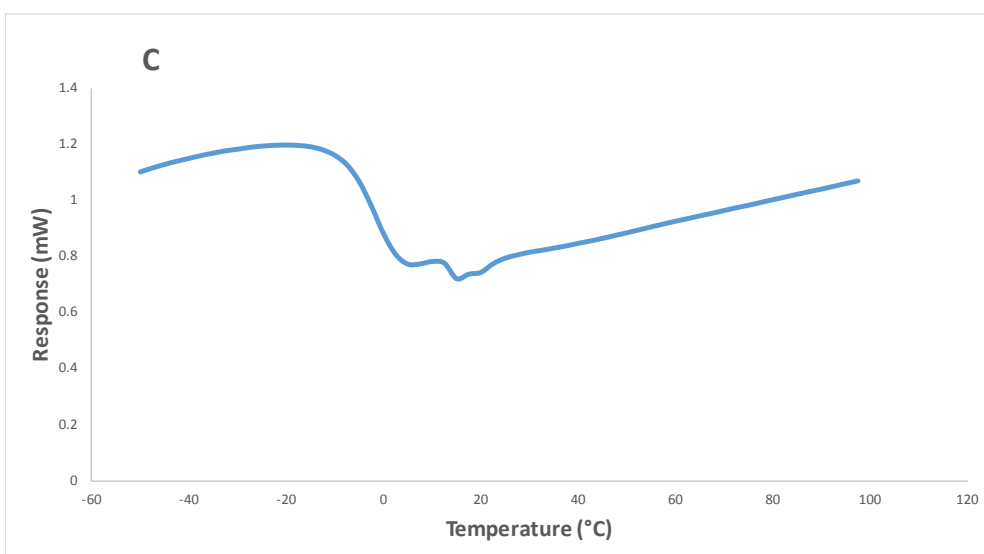

**Figure S7.** DSC thermograms of (PαBrCL-*co*-PCL)-*g*-PMA polymers (under N<sub>2</sub> atmosphere, second scan measurements, exo down); A) [PεCL<sub>60</sub>-*co*-PαBrCL<sub>8</sub>]-*g*-PMA<sub>160</sub>, B) [PεCL<sub>39</sub>-*co*-PαBrCL<sub>18</sub>]-*g*-PMA<sub>360</sub>, C) [PεCL<sub>24</sub>-*co*-PαBrCL<sub>30</sub>]-*g*-PMA<sub>600</sub>.
